# Supplementary material
Source: Springer Nature journal article supplement (https://www.springermedizin.de/resource/supplementary/13063_2007_206_MOESM5_ESM.pdf/9622294)

# Hazard Ratio (95% confidence interval)

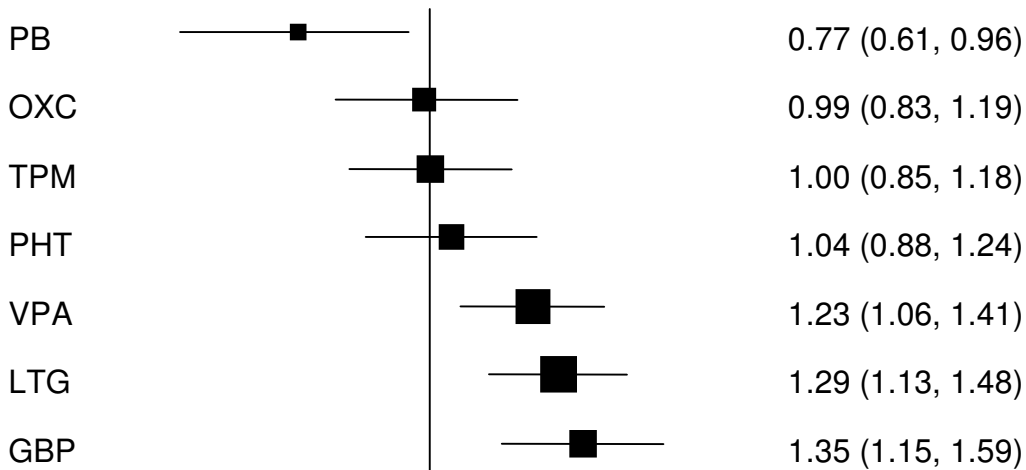

0.5 1 2

HR<1 CBZ worse

HR>1 CBZ better

Supplement: MOESM5 [file 9622294]
